# Supplementary material for: A prospective randomized trial examining health care utilization in individuals using multiple smartphone-enabled biosensors
Source: PeerJ. 2016 Jan 14;4:e1554. doi: 10.7717/peerj.1554 (PMC4715435; doi:10.7717/peerj.1554)
Supplement: Supplemental Information 2 [file peerj-04-1554-s002.xlsx]

## Sheet: Health Insurance Claims
1 in column names indicates claims during 6 months prior to study enrollment, 2 indicates claims during 6 months of study participation
1 indicates disease condition (arr=arrhythmia, htn=hypertension, iddm=insulin dependent diabetes, niddm=non-insulin dependent diabetes)
claims in dollar amounts, visits in counts
ID	group	status	arr	htn	iddm	niddm	all_claims1	all_claims2	arr_claims1	arr_claims2	htn_claims1	htn_claims2	dia_claims1	dia_claims2	pharm_claims1	pharm_claims2	office_visits1	office_visits2	er_visits1	er_visits2	inpatient_stays1	inpatient_stays2
1	control	withdrawn	0	1	0	0	210.64	205.04	0	0	125.04	205.04	0	0	293.49	565.95	1	1	0	0	0	0
2	control	complete	1	0	0	0	3599.5	4112.98	0	0	0	0	0	0	311.26	5069.77	12	10	0	0	0	0
3	control	complete	0	1	0	1	3963.21	155054	0	0	275.81	143090	488.43	143244	2633.94	3629.71	6	4	0	0	0	4
4	control	complete	0	1	0	0	171.96	788.74	0	0	0	308.41	0	0	28.35	79.92	0	1	0	0	0	0
5	monitor	complete	0	1	0	0	440.2	0	0	0	152.17	0	0	0	345.22	256.52	0	0	0	0	0	0
6	control	complete	0	1	0	0	499.62	5570.05	0	0	113.2	570.57	0	0	281.22	1701.02	3	12	0	0	0	0
7	control	complete	1	1	0	0	5428.22	2102.81	0	0	0	67.69	0	0	0	339.56	3	3	0	0	0	0
8	control	complete	1	0	0	0	0	0	0	0	0	0	0	0	0	0	0	0	0	0	0	0
9	monitor	complete	1	1	0	0	499.05	1007.06	0	0	103.17	0	0	0	2787.39	2650.88	2	6	0	0	0	0
10	monitor	complete	0	1	0	0	0	253.19	0	0	0	152.17	0	0	0	0	0	0	0	0	0	0
11	control	complete	1	1	0	0	934.31	6720.73	0	0	228.41	1462.09	0	0	1685.13	1567.8	7	11	0	0	0	0
12	control	complete	0	1	0	0	19459.4	12420.3	0	0	458.71	0	0	0	342.87	1016.78	16	8	0	0	0	0
13	monitor	complete	0	1	0	0	863.95	761.77	0	0	331.44	178.78	0	0	396.54	692.48	5	5	0	0	0	0
14	control	incomplete	0	0	0	1	600.18	798.77	0	0	0	0	214.28	559.65	568.63	510.62	1	5	0	0	0	0
15	monitor	complete	0	1	0	0	0	643.96	0	0	0	226.4	0	0	1044.42	825.29	0	3	0	0	0	0
16	monitor	complete	0	1	1	0	87013.2	55005.1	0	0	73887.4	484.91	40241.2	607.82	1234.56	717.41	10	11	0	1	18	7
17	monitor	complete	0	1	0	0	0	219.3	0	0	0	219.3	0	0	0	1.84	0	3	0	0	0	0
18	monitor	complete	0	1	0	0	3024.03	160457	0	0	1309.81	1189.95	0	0	10.94	115.23	3	12	0	0	0	13
19	monitor	complete	0	1	0	0	1482.58	349.52	0	0	93.2	263.04	0	0	155.18	116.1	4	1	0	0	0	0
20	monitor	complete	0	1	0	0	0	0	0	0	0	0	0	0	0	0	0	0	0	0	0	0
21	control	incomplete	0	1	0	0	0	0	0	0	0	0	0	0	0	0	0	0	0	0	0	0
22	control	incomplete	0	1	1	0	7813.23	1659.45	0	0	6144.75	93.2	6144.75	344.82	1292.25	711.28	2	8	0	0	4	0
23	control	complete	0	1	0	0	4004.77	1982.6	0	0	0	67.69	0	0	101.86	611.84	8	6	0	0	0	0
24	control	complete	0	1	0	1	0	0	0	0	0	0	0	0	0	0	0	0	0	0	0	0
25	control	incomplete	0	1	1	0	141.41	332.16	0	0	0	0	141.41	332.16	2022.89	6503.92	0	2	0	0	0	0
26	control	incomplete	0	1	0	1	729.48	435.58	0	0	0	0	0	139.91	256.39	0	3	1	0	0	0	0
27	monitor	withdrawn	0	1	0	1	3936.21	2165.37	0	0	782.31	494.49	1162.86	403.08	6051.93	2866.49	18	11	0	0	0	0
28	monitor	withdrawn	0	1	0	1	0	0	0	0	0	0	0	0	0	0	0	0	0	0	0	0
29	monitor	complete	1	1	0	0	0	0	0	0	0	0	0	0	0	0	0	0	0	0	0	0
30	control	complete	0	1	0	0	9549.74	103.92	0	0	149.84	12.9	0	0	0.8	0	6	1	2	0	0	0
31	monitor	complete	0	1	1	0	275.4	387.84	0	0	186.4	288.63	275.4	387.84	2718.86	3242.17	2	2	0	0	0	0
32	monitor	complete	0	1	0	0	0	0	0	0	0	0	0	0	0	0	0	0	0	0	0	0
33	monitor	complete	0	1	0	0	1628.49	395.09	0	0	72.37	84.1	0	0	229.7	425.16	5	0	0	0	0	0
34	control	complete	0	1	0	0	0	0	0	0	0	0	0	0	0	0	0	0	0	0	0	0
35	control	complete	0	1	0	0	0	0	0	0	0	0	0	0	0	0	0	0	0	0	0	0
36	monitor	complete	0	1	0	0	4858.95	4819.66	0	0	104.52	96.72	0	0	603.23	1045.26	6	3	0	0	0	0
37	monitor	complete	0	1	0	0	46790.7	371.25	0	0	19713.7	0	0	0	104.16	0	8	2	1	0	7	0
38	monitor	complete	0	1	0	0	72.37	435.43	0	0	0	427.26	0	0	173.54	173.81	1	2	0	0	0	0
39	control	incomplete	0	1	0	0	141.78	109.39	0	0	0	109.39	0	0	31.24	8.61	1	1	0	0	0	0
40	monitor	complete	0	1	0	0	0	0	0	0	0	0	0	0	0	0	0	0	0	0	0	0
41	monitor	complete	1	1	0	0	1114.5	594.93	93.2	93.2	452.48	93.2	0	0	95.05	267.41	3	2	0	0	0	0
42	control	incomplete	0	1	0	0	0	240.27	0	0	0	0	0	0	0	160.54	0	2	0	0	0	0
43	control	complete	0	1	0	0	419.03	0	0	0	149.84	0	0	0	119.31	163.96	0	0	0	0	0	0
44	control	complete	0	1	0	0	857.46	43.91	0	0	89.39	0	0	0	982.93	1827.59	3	0	0	0	0	0
45	control	complete	0	1	0	0	473.02	584.79	0	0	149.84	0	0	0	503.48	965.72	2	2	0	0	0	0
46	control	incomplete	1	1	0	0	5145.35	14462.1	5026.54	13793.1	3873.15	13292.3	0	0	435.45	585.9	0	2	0	0	0	0
47	monitor	complete	0	1	0	0	1679.21	8185.45	0	0	319.6	185.57	0	0	128.24	614.03	10	9	0	0	0	1
48	control	complete	0	1	0	0	5244.6	4526.46	0	0	136.48	206.48	0	0	264	188.6	9	6	0	0	0	0
49	control	complete	0	1	1	0	3049.91	5398.41	0	0	0	0	1726.66	1116.08	6428.09	6171.25	3	2	0	0	0	0
50	monitor	complete	0	1	0	0	1591.72	263.6	0	0	52.37	0	0	0	190.7	179.58	1	2	0	0	0	0
51	monitor	complete	1	0	0	0	805.56	2253.74	227.41	0	0	0	0	0	594.5	1044.02	4	5	0	0	0	0
52	monitor	incomplete	0	0	0	1	483.61	672.48	0	0	0	0	421.96	521.59	240.47	91.45	2	3	0	0	0	0
53	control	complete	0	1	1	0	784.47	957.76	0	0	404.29	254.07	420.21	254.07	397.8	900.4	0	0	1	0	0	0
54	control	complete	1	0	0	0	0	0	0	0	0	0	0	0	0	0	0	0	0	0	0	0
55	monitor	complete	0	1	0	0	3423.71	594.55	0	0	93.2	0	0	0	174.11	165.92	8	1	0	0	0	0
56	control	complete	0	1	0	0	1198.09	1086.63	0	0	356.85	390.07	0	0	160.18	197.93	4	3	0	0	0	0
57	monitor	complete	0	1	0	0	333.67	1357.14	0	0	333.67	755.36	0	0	14	0.38	1	3	0	0	0	0
58	monitor	incomplete	0	1	0	0	6289.94	841.4	0	0	0	152.17	0	0	14.18	34.73	2	1	0	0	0	0
59	control	complete	0	1	0	0	5991.99	418.39	0	0	109.39	109.39	0	0	95.06	9.73	8	4	0	0	0	0
60	monitor	complete	0	1	1	0	1263.64	631.69	0	0	93.2	0	137.7	136.48	3629.75	10417.3	5	5	0	0	0	0
61	control	incomplete	0	1	0	0	1122.82	48580.3	0	0	171.73	0	0	0	44.45	115.03	5	5	0	0	0	6
62	control	complete	1	1	0	0	4546.93	2186.14	3324.01	115.25	463.4	0	0	0	1308	792.06	6	9	0	0	1	0
63	control	withdrawn	0	1	0	1	361.9	2106.78	0	0	72.37	0	72.37	102.31	2729.21	3391.41	1	4	0	0	0	0
64	control	incomplete	1	0	0	1	765.04	5332.64	411.47	173.24	0	0	208.83	291.33	1438.36	1644.66	7	5	0	0	0	0
65	control	complete	0	0	0	1	1283.27	458.98	0	0	0	0	506.5	156.89	1410.33	1571.08	2	2	0	0	0	0
66	control	complete	0	1	0	0	1437.98	564.29	0	0	263.04	94.83	0	0	160.89	97.57	4	2	0	0	0	0
67	monitor	complete	0	1	0	0	233.71	1020.23	0	0	0	132.69	0	0	3464.37	4818.02	1	3	0	0	0	0
68	monitor	complete	0	1	0	0	340.53	1121.68	0	0	340.53	586.14	0	0	518.66	656.09	4	3	0	0	0	0
69	control	complete	0	1	0	0	615.34	1565.54	0	0	72.37	67.69	0	0	324.59	299.88	2	5	0	0	0	0
70	control	complete	0	1	0	0	470.96	592.76	0	0	253.65	159.75	0	0	184.35	245.83	2	2	0	0	0	0
71	monitor	withdrawn	1	1	1	0	0	89.39	0	0	0	0	0	0	1007.39	666.81	0	1	0	0	0	0
72	control	complete	1	1	0	0	169.21	405.44	45	0	117.37	250.29	0	0	60.76	232.14	2	1	0	0	0	0
73	monitor	complete	0	1	0	0	180414	1170.16	0	0	1952.85	0	0	0	473.02	1576.26	7	3	0	0	29	0
74	monitor	complete	1	1	0	0	3912.47	1403.94	0	0	93.2	93.2	0	0	3593.23	1361.85	16	19	0	0	0	0
75	control	complete	0	1	0	0	1674.76	3274.63	0	0	113.2	379.19	0	0	8128.51	9554.99	5	10	0	0	0	0
76	control	complete	1	1	1	0	1109.7	1524.93	0	0	443.98	283.34	1003.84	1090.05	3139.83	1405.48	2	5	0	0	0	0
77	monitor	withdrawn	0	0	0	1	19044.2	272082	0	0	0	0	10176.4	183214	1472.06	1050.53	13	6	0	0	1	30
78	control	complete	0	0	0	1	3440.82	620.96	0	0	0	0	224.25	347.79	1768.54	815.23	1	2	0	0	0	0
79	monitor	complete	0	1	1	0	11988.4	6774.72	0	0	136.58	87.37	5102.42	1627.54	4191.24	2099.44	10	14	0	0	0	0
80	control	complete	0	1	0	0	27038.6	8650.66	0	0	12033	2106.75	0	0	9954.84	12199.4	23	11	4	0	1	1
81	control	complete	0	1	0	0	0	67.69	0	0	0	0	0	0	2772.97	3148.57	0	1	0	0	0	0
82	control	complete	0	1	0	0	960.87	7270.63	0	0	100.44	104.28	0	0	1037.63	1289.75	1	6	0	0	0	0
83	control	complete	0	1	0	1	4822.83	275.92	0	0	233.53	0	129.42	0	1123.06	222.92	3	2	0	0	0	0
84	monitor	complete	0	0	0	1	2567.78	3711.14	0	0	0	0	238.17	320.32	416.8	328.57	4	5	0	0	0	0
85	control	complete	0	1	0	0	56324.9	1206.86	0	0	2125.31	222.59	0	0	4.29	15.53	6	8	0	0	7	0
86	control	incomplete	1	0	0	0	10209.8	178.78	9648	178.78	0	0	0	0	872.36	976.4	7	2	3	0	0	0
87	control	incomplete	0	1	0	0	72.67	355.43	0	0	0	186.4	0	0	0.16	1.9	0	2	0	0	0	0
88	monitor	complete	0	1	0	0	0	0	0	0	0	0	0	0	0	0	0	0	0	0	0	0
89	control	complete	0	1	0	0	732.58	3168.73	0	0	0	312.31	0	0	557.72	163.38	3	4	0	0	0	0
90	control	complete	0	1	0	0	635.13	62.76	0	0	0	0	0	0	75.26	27.32	4	0	0	0	0	0
91	control	complete	0	1	0	1	515.74	2843.77	0	0	0	0	166.27	28.58	1476.7	1264.8	1	2	0	0	0	0
92	monitor	complete	0	1	0	0	11396	14276.2	0	0	402.03	52.67	0	0	1210	919.44	15	14	0	0	0	0
93	monitor	complete	1	1	0	0	643.41	956.36	0	89.39	93.2	89.39	0	0	0	0	3	1	0	0	0	0
94	monitor	complete	0	1	0	1	5768.47	508.51	0	0	2183.9	113.2	365.25	206.63	435.54	1348.85	3	3	0	0	0	0
95	control	complete	0	1	0	1	489.1	5442.1	0	0	0	0	213.23	143.67	647.38	1040.41	6	5	0	0	0	0
96	monitor	complete	0	1	0	0	678.19	2222.22	0	0	616.13	1671.24	0	0	29.23	262.37	4	7	0	1	0	0
97	control	incomplete	0	1	0	0	0	0	0	0	0	0	0	0	0	0	0	0	0	0	0	0
98	monitor	complete	0	0	1	0	32568.3	3279.17	0	0	0	0	927.4	917.89	20196.2	32619.8	19	9	0	0	0	0
99	monitor	complete	1	0	0	0	7407.95	3374.21	499.55	561.41	0	0	0	0	675.79	641.61	8	11	0	0	0	0
100	control	incomplete	0	1	0	0	916.42	1359.4	0	0	0	0	0	0	549.72	69.89	5	5	0	0	0	0
101	control	complete	1	1	0	0	53910.2	94394	53480.2	93692.2	93.2	89.39	0	0	3155.72	2374.58	8	7	0	0	2	6
102	control	complete	0	1	0	0	0	0	0	0	0	0	0	0	0	0	0	0	0	0	0	0
103	monitor	complete	0	1	0	1	2930.81	2622.97	0	0	93.2	494.5	294.17	564.84	2035.15	2869	10	4	0	0	1	0
104	monitor	complete	0	1	0	0	1695.17	845.15	0	0	0	645.3	0	0	81.22	7.62	3	7	0	0	0	0
105	control	complete	1	1	1	0	648.18	485.4	108.6	108.6	93.2	93.2	137.7	175.27	7610.26	8592	1	2	0	0	0	0
106	control	complete	0	1	0	0	2351.67	6267.69	0	0	449.54	4328.21	0	0	400.23	173.66	12	11	0	3	0	0
107	monitor	withdrawn	0	1	0	0	19863.6	284.45	0	0	314.07	0	0	0	297.05	156.54	12	1	0	0	3	0
108	control	complete	1	1	0	0	0	0	0	0	0	0	0	0	0	0	0	0	0	0	0	0
109	monitor	complete	0	1	0	1	369.09	612.09	0	0	0	229.75	240.31	197.51	3531.14	1606.09	3	2	0	0	0	0
110	control	complete	0	1	0	0	1968.96	2510.05	0	0	181.76	398.05	0	0	118.55	372.25	13	15	0	0	0	0
111	control	complete	0	1	0	0	1012.9	904.95	0	0	93.2	109.39	0	0	322.24	345.6	7	3	0	0	0	0
112	control	complete	0	0	0	1	3073.2	429.57	0	0	0	0	460.03	132.35	246.67	223.8	2	2	0	0	0	0
113	control	withdrawn	1	1	0	0	735.62	0	564.87	0	170.75	0	0	0	0	0	3	0	0	0	0	0
114	control	complete	1	0	1	0	930.11	3033.42	0	0	0	0	375.14	403.39	2494.21	3078.5	3	9	0	0	0	0
115	monitor	complete	0	1	0	1	2680.7	488.15	0	0	269.68	292.49	2325.69	463.15	0	126.72	4	2	1	0	0	0
116	monitor	complete	0	1	0	0	332.41	3355.33	0	0	0	1932.17	0	0	732.05	1489.12	1	14	0	0	0	0
117	monitor	complete	0	1	0	0	7091.9	288.65	0	0	60.18	180.32	0	0	45.64	10.8	1	1	0	0	0	0
118	monitor	incomplete	0	1	0	0	3942.56	2142.44	0	0	0	229.83	0	0	-15.83	83.62	1	1	0	0	0	0
119	control	complete	0	1	0	0	292.03	614.56	0	0	113.2	0	0	0	531.88	383.43	1	0	0	0	0	0
120	monitor	complete	0	1	0	0	3506.58	41888.4	0	0	0	563.1	0	0	680.71	284.97	11	16	0	0	0	0
121	control	incomplete	0	0	0	1	0	395.23	0	0	0	0	0	158.63	1.66	485.18	0	2	0	0	0	0
122	monitor	complete	0	1	0	0	520.74	354.17	0	0	0	0	0	0	16070.1	15592.7	3	3	0	0	0	0
123	control	complete	0	1	0	0	9918.78	3035.13	0	0	156.48	205.88	0	0	9008.68	3864.89	7	5	0	0	1	0
124	control	complete	0	1	0	0	0	0	0	0	0	0	0	0	0	0	0	0	0	0	0	0
125	monitor	complete	1	1	0	0	1497.8	2038.36	52.37	109.39	147.2	109.39	0	0	0	28.07	3	2	0	0	0	0
126	control	incomplete	0	0	1	0	140.06	475	0	0	0	0	72.37	89.43	1715.04	4695.39	2	2	0	0	0	0
127	monitor	complete	0	1	0	0	1203.57	6412.86	0	0	222.21	306.34	0	0	888.78	1877.33	3	4	0	0	0	0
128	monitor	complete	0	1	1	0	2449.15	1301.4	0	0	149.37	0	358.49	514.52	91.95	1.1	3	4	0	0	0	0
129	control	complete	0	1	0	0	2891.25	774.98	0	0	0	311.76	0	0	1987.54	1357.51	4	1	1	0	0	0
130	control	complete	0	1	0	1	2694.36	2307.88	0	0	512.7	462.7	226.4	501.83	326.06	781.57	10	9	0	0	0	0
131	monitor	withdrawn	0	0	1	0	1327.48	1576.42	0	0	0	0	542.77	655.43	30.88	2155.56	5	5	0	0	0	0
132	monitor	incomplete	0	1	0	0	0	6015.22	0	0	0	2046.25	0	0	0	49.77	0	6	0	0	0	0
133	monitor	complete	0	1	0	0	1061.32	67.69	0	0	56.31	0	0	0	200	191.21	1	1	0	0	0	0
134	monitor	complete	0	1	0	0	596.81	32.44	0	0	64.99	32.44	0	0	14.67	7.46	0	1	0	0	0	0
135	monitor	complete	0	1	0	0	472.35	176.93	0	0	0	0	0	0	794.53	19.21	1	0	0	0	0	0
136	control	complete	0	1	0	0	260	2075.98	0	0	0	305.84	0	0	804.02	1837.79	3	5	0	0	0	0
137	control	complete	0	0	1	0	208.15	109.39	0	0	0	0	208.15	109.39	1855.62	3025.63	1	1	0	0	0	0
138	monitor	complete	1	1	0	0	654.43	1513.82	455.14	443.6	0	71.86	0	0	1289.15	1477.1	4	1	0	2	0	0
139	monitor	complete	0	1	0	0	664.19	2671.03	0	0	113.2	311.98	0	0	123.68	318.76	3	6	0	0	0	0
140	monitor	complete	0	1	0	0	1335.49	22061.8	0	0	117.13	17072.9	0	0	1003.69	825.89	4	4	0	0	0	4
141	control	incomplete	1	1	0	0	0	0	0	0	0	0	0	0	0	0	0	0	0	0	0	0
142	control	complete	0	1	0	0	3822.21	1084.46	0	0	226.4	109.39	0	0	13134.2	12984.6	7	12	1	0	0	0
143	monitor	complete	0	1	0	0	14857.3	2606.02	0	0	297.47	0	0	0	165.28	164.54	3	3	0	0	0	0
144	control	complete	0	1	0	1	860.1	619.41	0	0	0	218.78	314.15	452.18	302.24	610.95	3	3	0	0	0	0
145	monitor	complete	0	1	0	0	412.56	1412.87	0	0	104.74	47.69	0	0	29.28	645.96	4	5	0	0	0	0
146	monitor	complete	0	1	0	0	466.88	41	0	0	382.77	0	0	0	0.47	9.29	2	1	0	0	0	0
147	control	complete	0	1	0	0	0	0	0	0	0	0	0	0	0	0	0	0	0	0	0	0
148	control	complete	0	0	1	0	2841.74	982.9	0	0	0	0	441.46	110.75	4128.03	4753.93	2	8	1	0	0	0
149	monitor	complete	0	0	0	1	175.26	737.95	0	0	0	0	175.26	176.02	203.4	340.05	1	1	0	0	0	0
150	monitor	complete	0	1	1	0	0	660.97	0	0	0	89.39	0	392.75	2035.79	3191.76	0	3	0	0	0	0
151	monitor	complete	0	1	0	0	990.3	220.08	0	0	635.39	0	0	0	206.51	0.2	2	0	0	0	0	0
152	control	complete	1	1	0	0	3584.79	78.64	1772.25	0	322.24	0	0	0	158.56	241.26	5	2	0	0	0	0
153	monitor	complete	0	1	0	0	808.13	72.37	0	0	0	72.37	0	0	1426.38	1482.6	4	1	0	0	0	0
154	monitor	complete	0	1	1	0	1677.58	15077.4	0	0	0	2595.5	269.27	437.58	35348.5	37044.3	8	10	0	0	0	0
155	monitor	complete	0	1	0	0	1493.23	1549.73	0	0	113.2	0	0	0	3340.72	2186.77	8	5	0	0	0	0
156	control	complete	0	1	0	0	0	0	0	0	0	0	0	0	0	0	0	0	0	0	0	0
157	monitor	complete	0	1	0	0	295.34	3788.3	0	0	0	153.24	0	0	638.69	818.06	1	11	0	0	0	0
158	control	complete	0	1	0	1	539.74	301.65	0	0	264.67	0	0	0	129.65	35.9	1	1	0	0	0	0
159	control	complete	0	1	0	1	993.2	806.6	0	0	93.2	182.59	147.09	419.55	3253.92	3763.33	4	8	0	0	0	0
160	control	complete	1	1	0	0	12527.3	877.08	10429.2	586.06	511.55	219.86	0	0	324.02	721.44	10	3	1	0	2	0
